# Supplementary material
Source: PubMed Central journal article supplement (PMC4030815)

## SUPPLEMENTARY DATA

**Fig. S1.** Dot matrix plots showing the presence of a 36 kb inversion in *Lupinus luteus* plastome. (A) Comparison of *Lupinus luteus* to *Glycine max* (Fabaceae) plastome revealing the presence of a 36 kb inversion. (B) Comparison of *Lupinus luteus* to *Cucumis sativus* (Fabaceae outgroup) revealing the presence of a 36 kb inversion embedded in the 50 kb inversion present in most Papilionideae (Fabaceae).

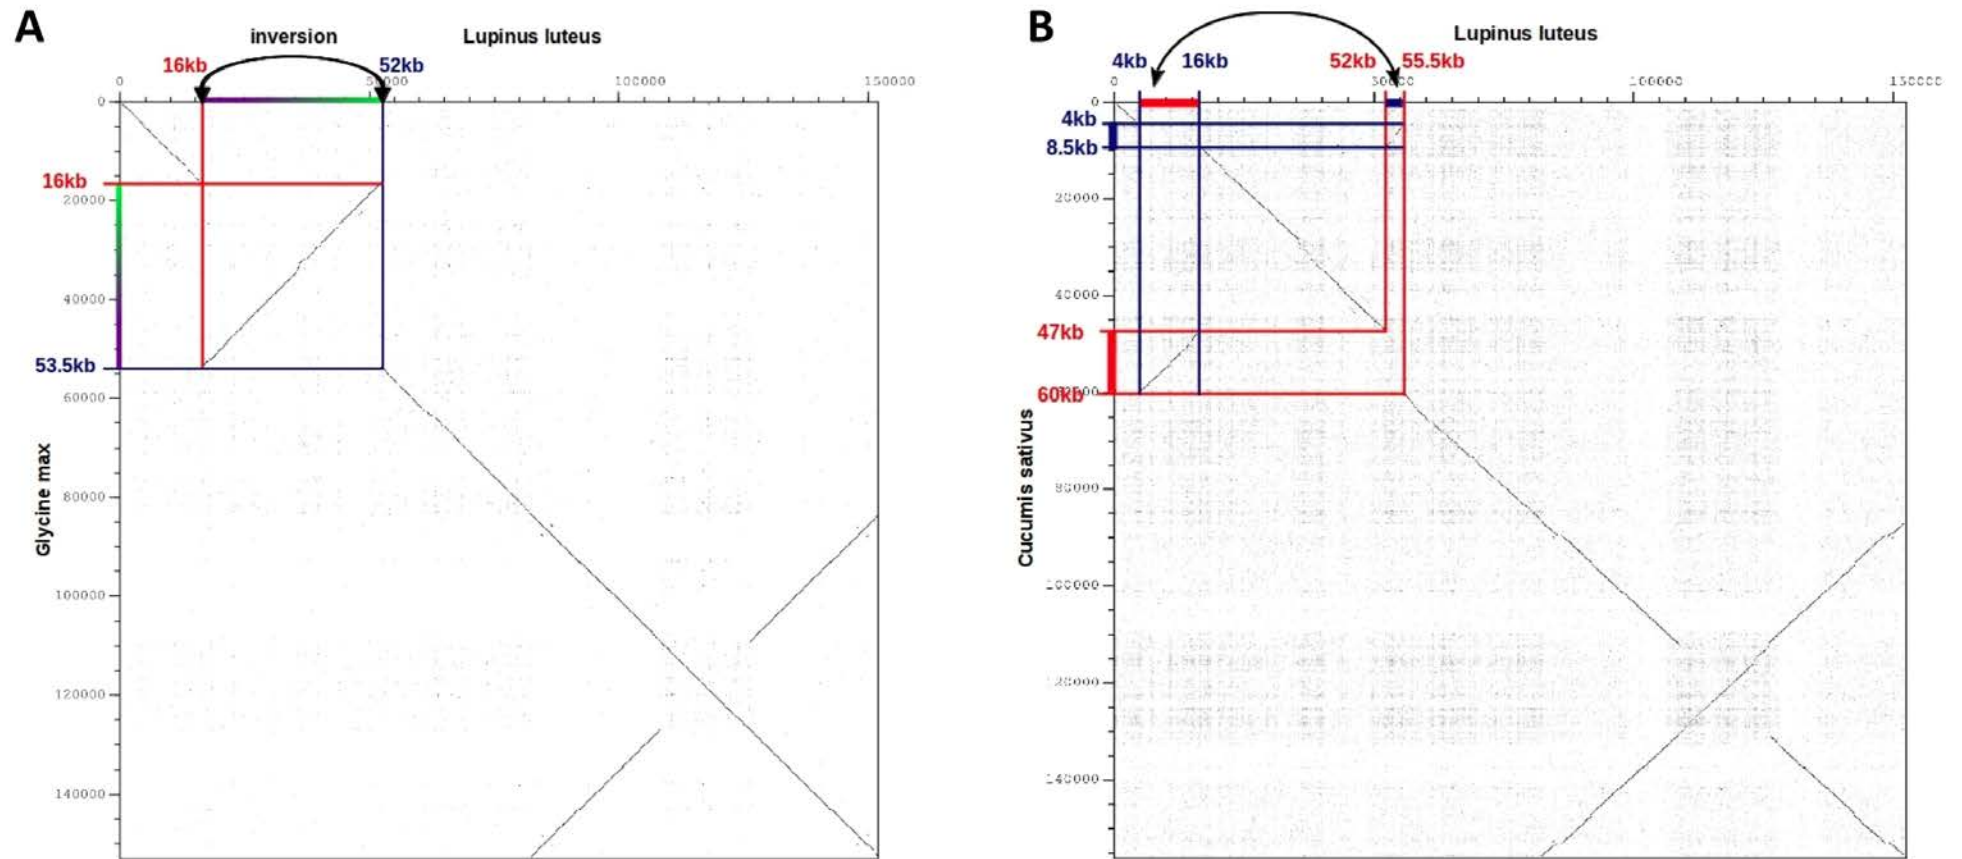

**Fig. S2.** Comparative plastomic maps showing the presence of a 36 kb inversion in *Lupinus luteus* in comparison to other Papilionoideae. The genes present and directly surrounding this inversion are shown. Only four representatives of the Fabaceae species having their plastomes fully sequenced (*Glycine max*, *Phaseolus vulgaris*, *Lotus japonicus* and *Medicago truncatula*) are presented here and the phylogenetic relationships between the different Papilionoideae represented are redrawn from Cardoso et al. (2012). The blue circle on a branch indicates the origin of the 36kb inversion event. The partial plastomic maps are drawn to scale.

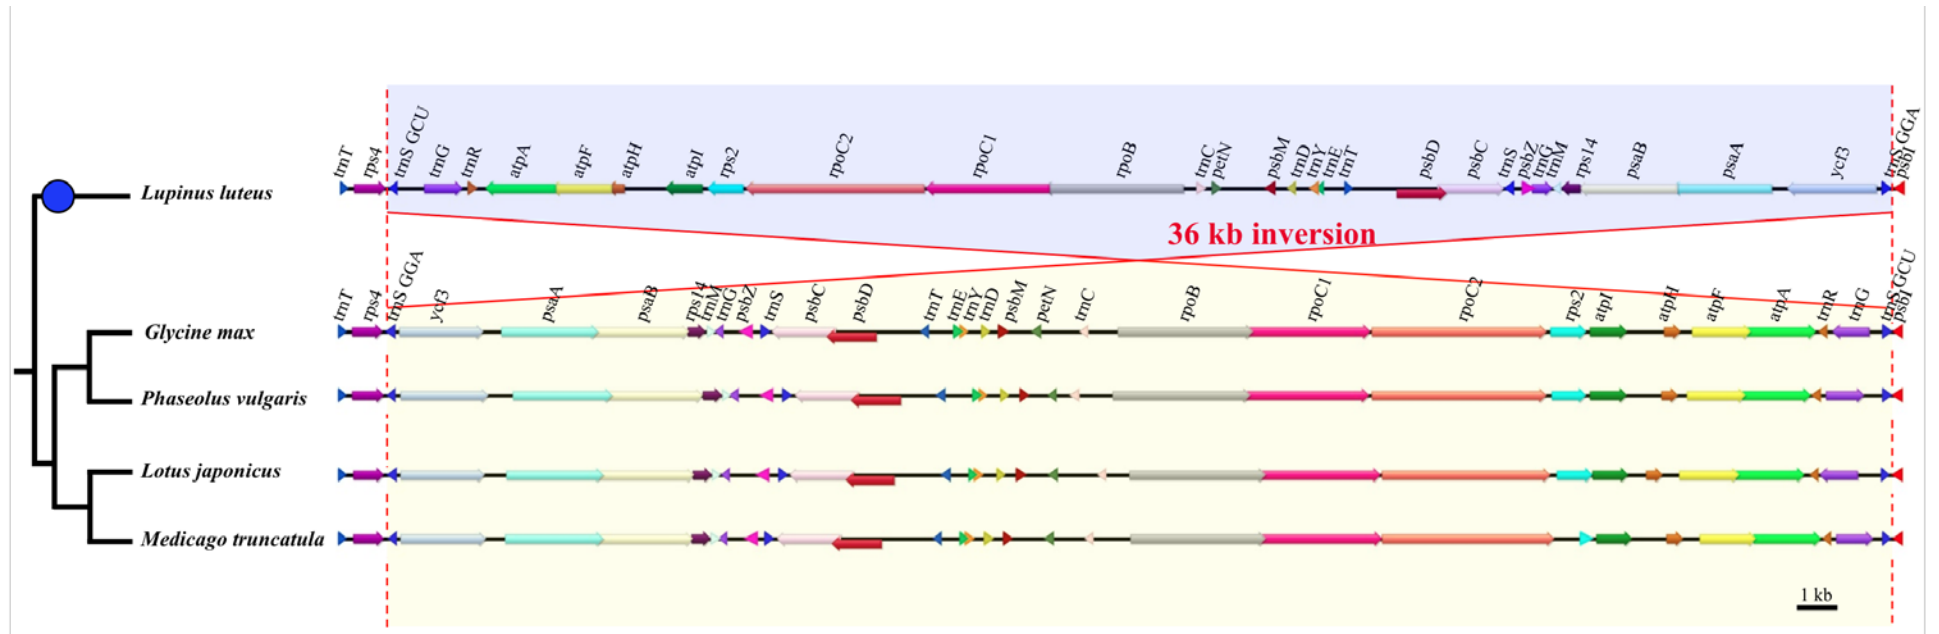

**Fig. S3.** Phylogenetic analysis of plastidic and nuclear *rpl22* protein sequences. Presented is a Neighbor Joining tree obtained using Jukes–Cantor model and rooted using the eubacteria *Mycoplasma*. Bootstrap values obtained from 10,000 replicates are shown above the branches. The scale bar denotes substitutions per site along the branches. GenBank accession numbers of the *rpl22* chloroplastic sequences are as follows: *Cyanophora paradoxa* (NC\_001675), *Gracilaria tenuistipitata* (NC\_006137), *Marchantia polymorpha* (NC\_001319) *Mycoplasma* (M74770), *Nicotiana tabacum* (NC\_001879), *Oryza sativa indica* (NC\_008155), *Pelargonium x. hortorum* (NC\_008454), *Spinacia oleracea* (NC\_002202) and *Zea mays* (NC\_001666). GenBank accession numbers of the *rpl22* genes functionally transferred from the chloroplast to the nucleus in a common ancestor of all flowering plants (Gantt *et al.*, 1991) are: *Lupinus mariae josephi* nuc (sequence available upon request) and *Pisum sativum* nuc (M60951).

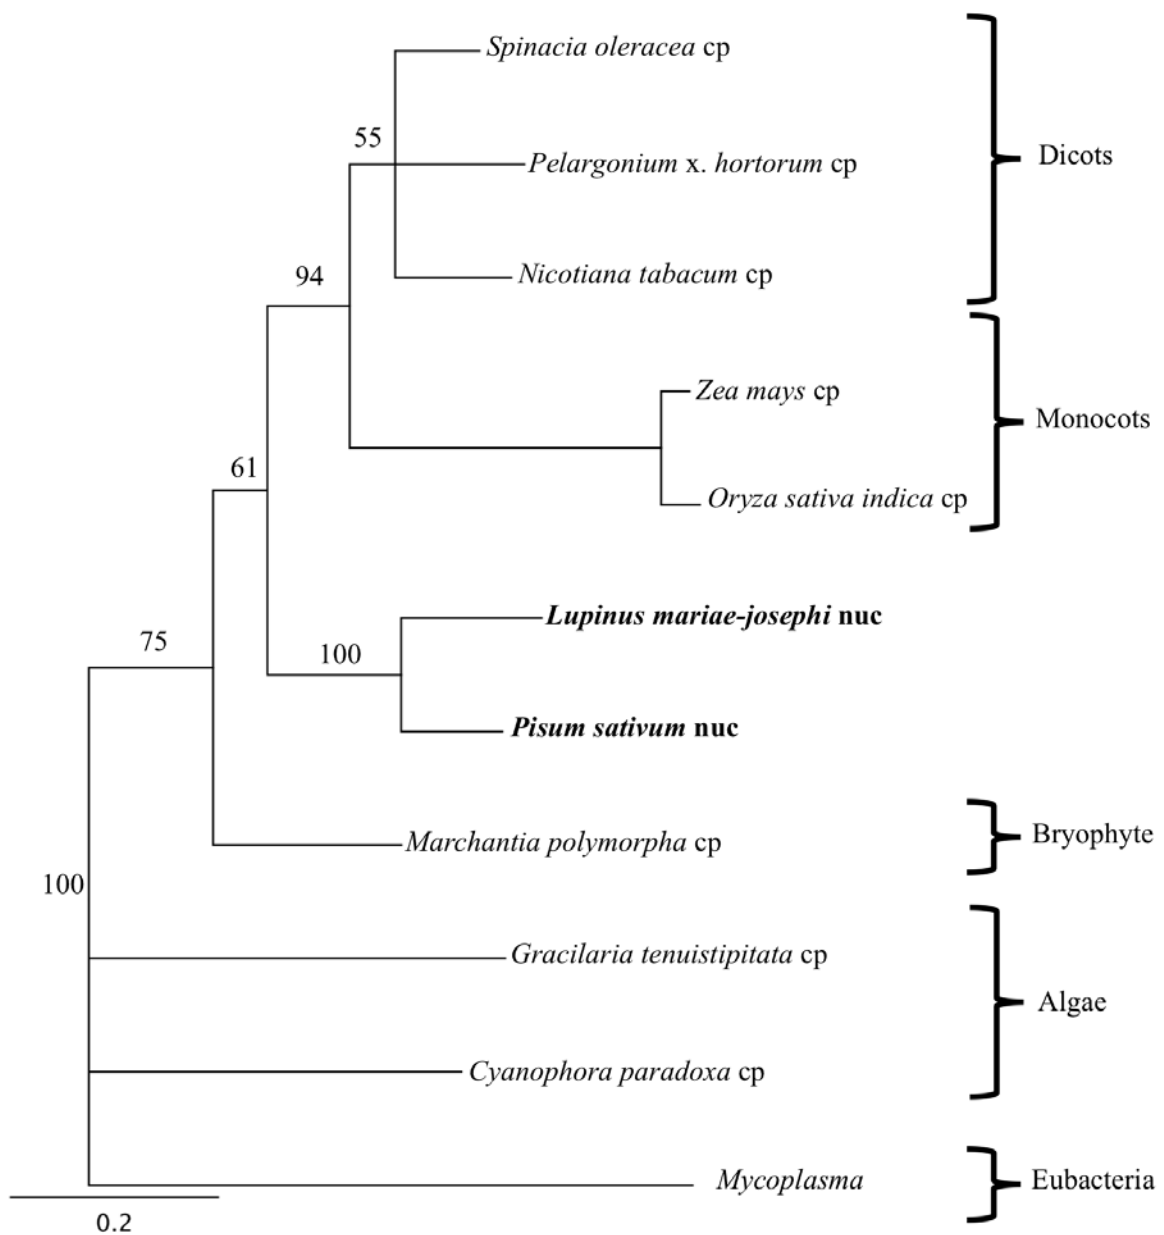



**Fig. S5.** Synonymous and non-synonymous divergence in Legume *ycf4* gene. Shown are *dN* (left) and *dS* (right) phylogenetic trees obtained from a codon based maximum likelihood method (GTR + G + I model). The trees, obtained using MEGA 5.0 (Tamura, 2011), were rooted with the *Populus alba* sequence. Bootstrap values obtained from 1,000 replicates are shown on each branch. The asterisk indicates the branch in which rate acceleration is first seen (Magee *et al.*, 2010). The scale bar denotes substitutions per site along the branches. The legume *ycf4* sequences were obtained from Stefanovic *et al.* (2009) and Magee *et al.* (2010).

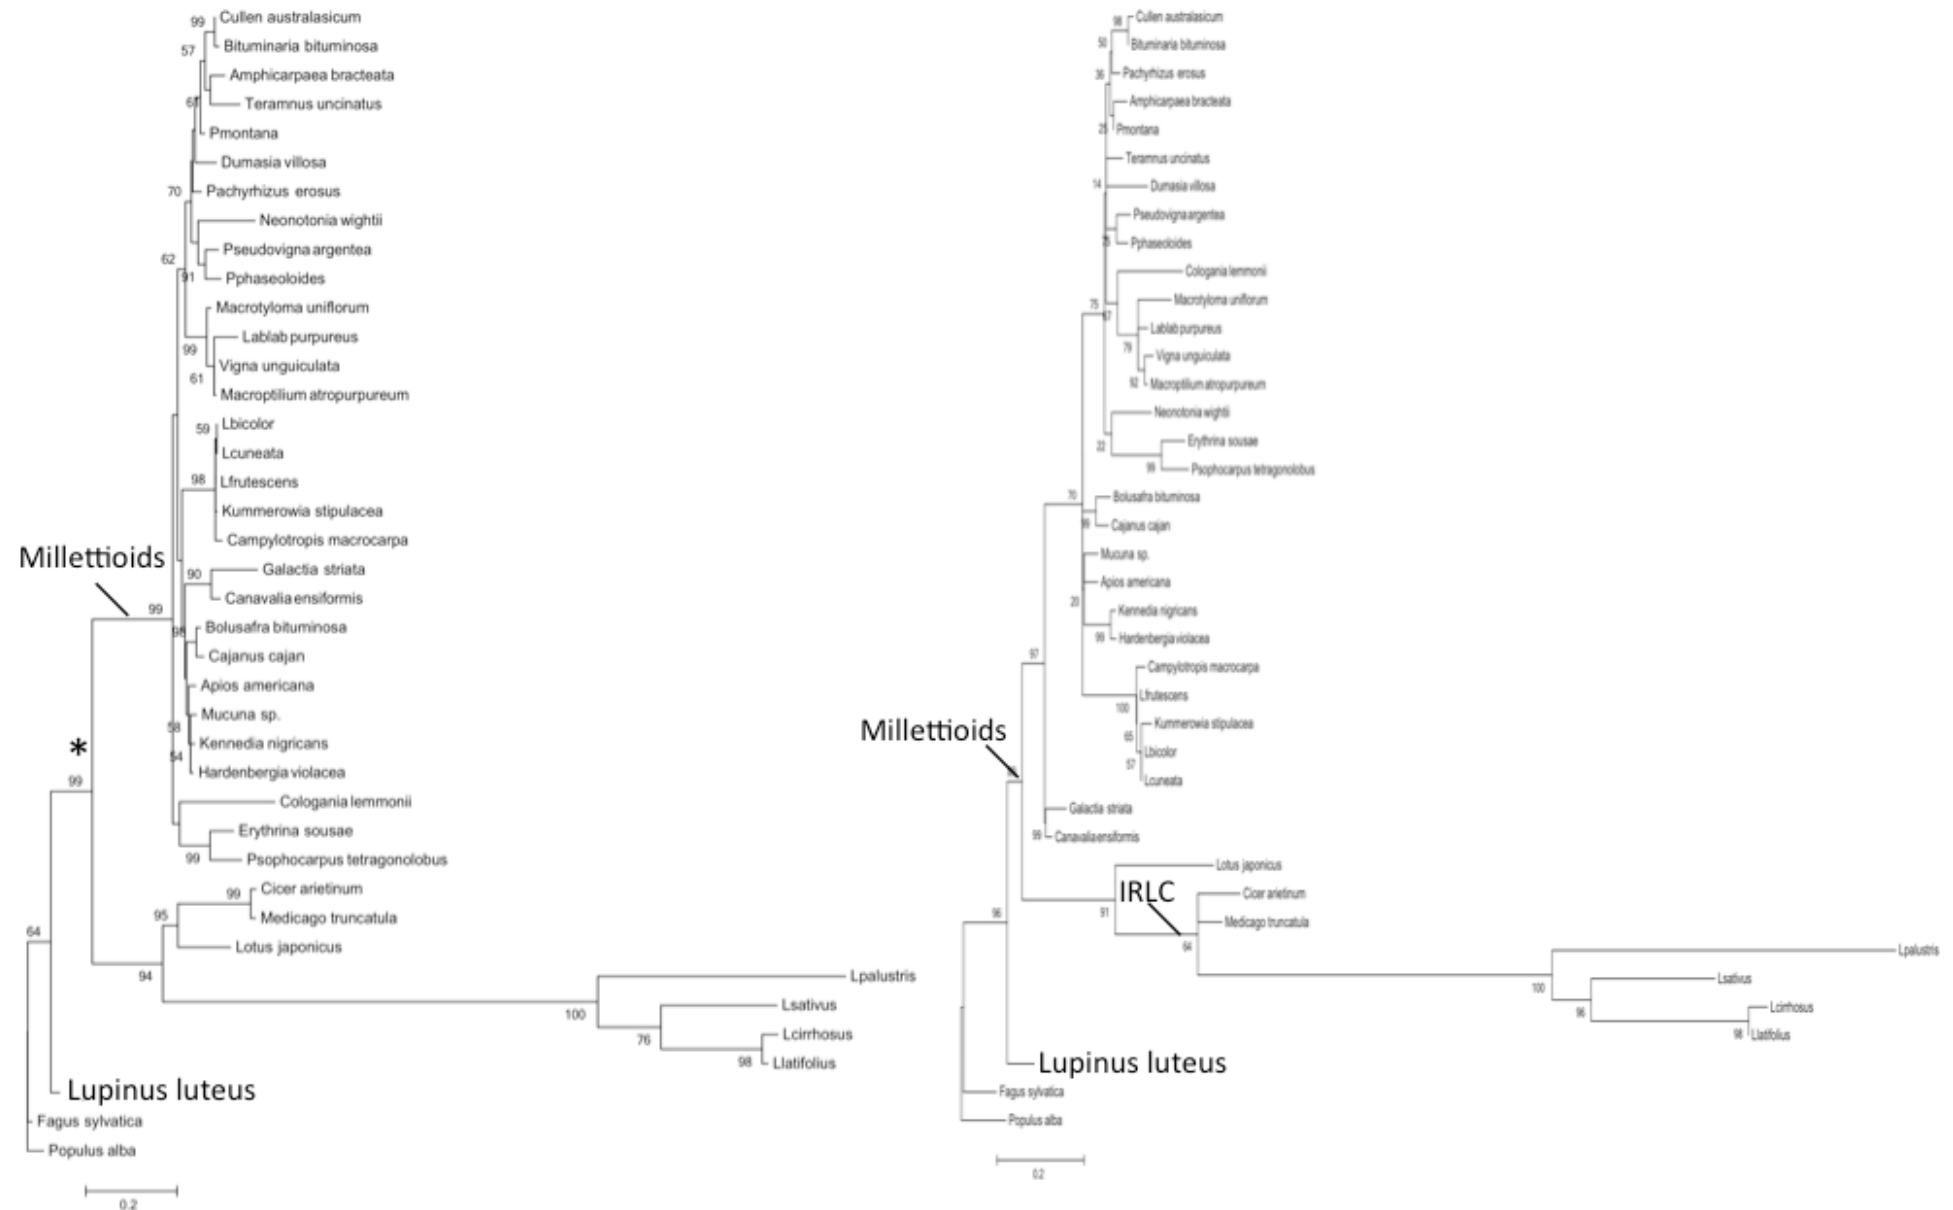

Supplement: supp_mcu050_mcu050supp_figs.pdf [file supp_mcu050_mcu050supp_figs.pdf]
